# Supplementary material for: Increasing Early Childhood Screening in Primary Care Through a Quality Improvement Collaborative
Source: Oxford University Press journal article supplement (doi:10.1542/peds.2019-2328), 2020-08-07
Supplement: peds_20192328supplementarydata.pdf [file peds_20192328supplementarydata.pdf]

# Supplemental Information

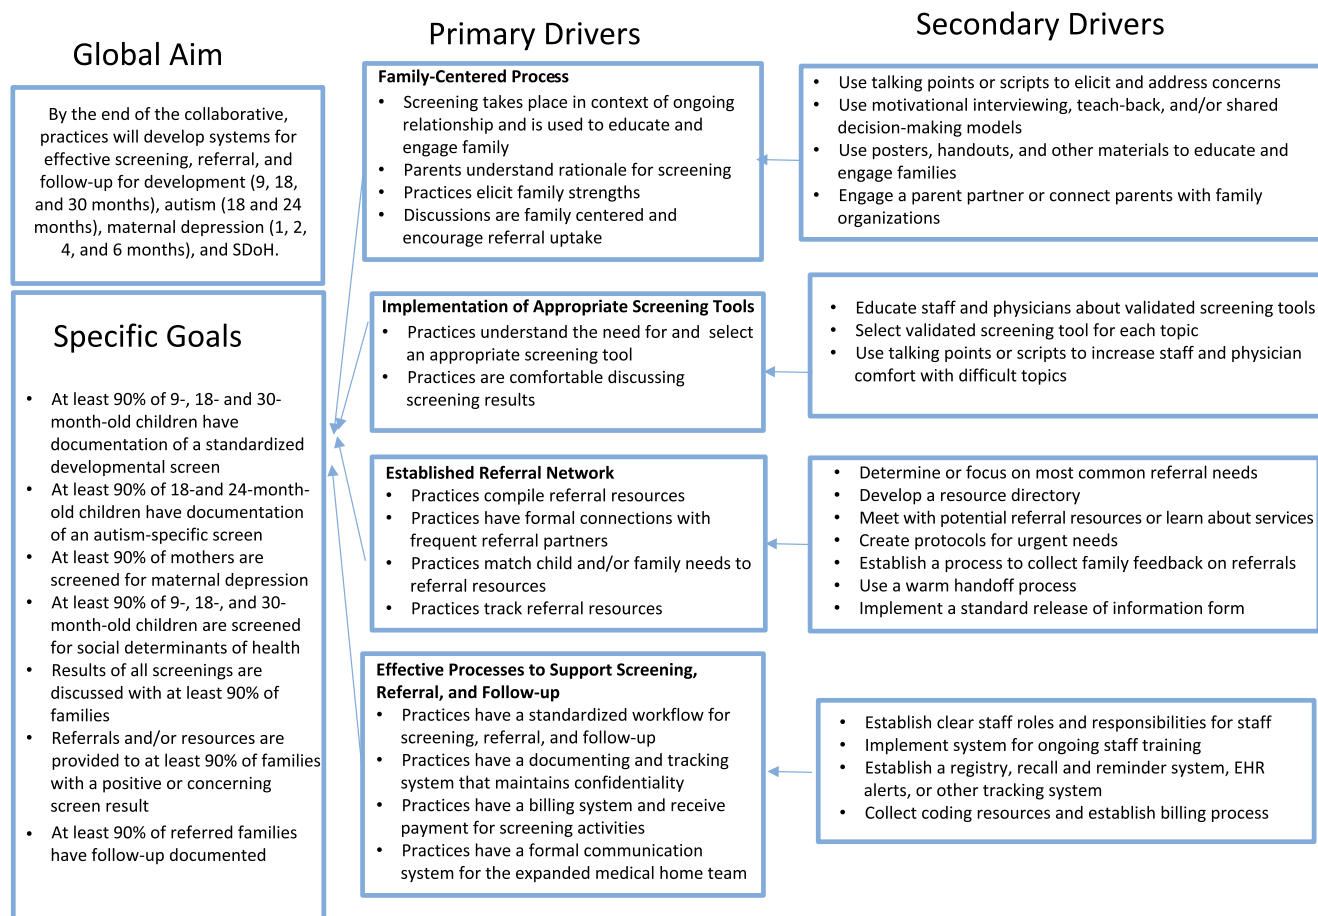

**SUPPLEMENTAL FIGURE 3**

Key driver diagram.

**SUPPLEMENTAL TABLE 6** Screening Tools Selected by Project I-SCRN Practices

| Screening Domain           | Screening Tool                                  | <i>n</i> | %  |
|----------------------------|-------------------------------------------------|----------|----|
| Development                | Ages and Stages Questionnaire                   | 8        | 53 |
|                            | Survey of Well-being of Young Children          | 4        | 27 |
|                            | Parents' Evaluation of Developmental Status     | 3        | 20 |
| Autism                     | Modified Checklist for Autism in Toddlers       | 13       | 87 |
|                            | Survey of Well-being of Young Children          | 2        | 13 |
| Maternal depression        | Edinburgh Postnatal Depression Scale            | 10       | 67 |
|                            | Patient Health Questionnaire 2                  | 3        | 20 |
|                            | Survey of Well-being of Young Children          | 2        | 13 |
| SDoH                       | Survey of Well-being of Young Children          | 4        | 27 |
|                            | Hunger Vital Signs                              | 3        | 20 |
|                            | Health Leads Screening Tool <sup>a</sup>        | 3        | 20 |
| Social-emotional screening | Survey of Well-being of Young Children          | 4        | 27 |
|                            | Ages and Stages Questionnaire: Social-Emotional | 2        | 13 |

Total (*N* = 15) practices that provided detailed information about screening tool use.

<sup>a</sup> Includes practices that used a modified version of the Health Leads Screening Tool.

**SUPPLEMENTAL TABLE 7** Project I-SCRN Measures Table

| Measure Name and Type                                       | Description or Definition                                                                                                                                               | Measure Calculation (Numerator and Denominator)                                                                                                                                                                                                                                                                                                                                           |
|-------------------------------------------------------------|-------------------------------------------------------------------------------------------------------------------------------------------------------------------------|-------------------------------------------------------------------------------------------------------------------------------------------------------------------------------------------------------------------------------------------------------------------------------------------------------------------------------------------------------------------------------------------|
| Developmental screening                                     | Percentage of children who completed a developmental screening using a standardized, validated tool at the 9-, 18-, and 30-mo WCV                                       | Numerator: No. children seen at their 9-, 18-, and 30-mo WCV with documentation in the health record of a completed validated developmental screening at the time of the visit; denominator: all children seen for their 9-, 18-, and 30-mo visit whose health records are reviewed                                                                                                       |
| Discussion of developmental screening results               | Percentage of children for whom it is documented that the family participated in a discussion of the developmental screening results at the 9-, 18-, and 30-mo WCV      | Numerator: No. children seen at their 9-, 18-, and 30-mo WCV with documentation in the health record of a discussion of developmental screening results; denominator: all children seen for their 9-, 18-, and 30-mo WCV with documentation in the health record of a completed validated developmental screening                                                                         |
| Referral for positive developmental screening results       | Percentage of children with a positive developmental screen result for whom a referral was made at the 9-, 18-, and 30-mo WCV                                           | Numerator: No. children seen at their 9-, 18-, and 30-mo WCV with documentation of a referral; denominator: all children seen for their 9-, 18-, and 30-month WCV with a positive developmental screening                                                                                                                                                                                 |
| Follow-up on developmental referral status                  | Percentage of children who received a referral at the 9-, 18-, and 30-mo WCV for whom follow-up was attempted within 4 wk                                               | Numerator: No. children seen at their 9-, 18-, and 30-mo WCV with documentation of attempted follow-up with the family within 4 wk of referral; denominator: all children seen for their 9-, 18-, and 30-mo WCV with documentation of a referral                                                                                                                                          |
| ASD screening                                               | Percentage of children who completed an ASD screening using a validated tool at the 18- and 24-mo WCV                                                                   | Numerator: No. children seen at their 18- and 24-mo WCV with documentation in the health record of a completed validated ASD screening at the time of the visit; denominator: all children seen for their 18- and 24-mo WCV whose health records are reviewed                                                                                                                             |
| Discussion of ASD screening results                         | Percentage of children for whom it is documented that the family participated in a discussion of the ASD screening results at the 18- and 24-mo WCV                     | Numerator: No. children seen at their 18- and 24-mo WCV with documentation in the health record of a discussion of the ASD screening results; denominator: all children seen for their 18- and 24-mo WCV with documentation in the health record of a completed validated ASD screening                                                                                                   |
| Referral for positive ASD screening results                 | Percentage of children with a positive ASD screen result for whom a referral was made at the 18- and 24-mo WCV                                                          | Numerator: No. children seen at their 18- and 24-mo WCV with documentation of a referral; denominator: all children seen for their 18- and 24-mo WCV with a positive ASD screening result                                                                                                                                                                                                 |
| Follow-up on ASD referral status                            | Percentage of children who received a referral at the 18- and 24-mo WCV for whom follow-up was attempted within 4 wk                                                    | Numerator: No. children seen at their 18- and 24-mo WCV with documentation of attempted follow-up with the family within 4 wk of referral; denominator: all children seen for their 18- and 24-mo WCV with documentation of a referral                                                                                                                                                    |
| Maternal depression screening                               | Percentage of infants whose mothers completed at least 1 maternal depression screening using a validated tool by the 9-mo WCV                                           | Numerator: No. infants seen at their 9-month WCV with documentation in the health record of at least 1 validated maternal depression screening completed by the mother at the 1-, 2-, 4-, or 6-mo WCV; denominator: all infants seen for their 9-mo WCV whose health records are reviewed                                                                                                 |
| Discussion of maternal depression screening results         | Percentage of infants for whom it is documented that the mother participated in a discussion of the maternal depression screening results at least once by the 9-mo WCV | Numerator: No. infants seen at their 9-mo WCV with documentation in the health record of a discussion of maternal depression screening results at least once at the 1-, 2-, 4-, or 6-mo WCV; denominator: all infants seen for their 9-mo WCV with documentation in the health record of a completed validated maternal depression screening at least once at the 1-, 2-, 4-, or 6-mo WCV |
| Referral for positive maternal depression screening results | Percentage of infant-mother dyads with a positive maternal depression screen result for whom a referral was made at the 1-, 2-, 4-, or 6-mo WCV                         | Numerator: No. infants seen at their 9-mo WCV with documentation of a referral for the mother-infant dyad; denominator: all infants seen for their 9-mo WCV with a positive maternal depression screening result at the 1-, 2-, 4-, or 6-mo WCV                                                                                                                                           |

**SUPPLEMENTAL TABLE 7** Continued

| Measure Name and Type                                    | Description or Definition                                                                                                                                                             | Measure Calculation (Numerator and Denominator)                                                                                                                                                                                                                                                                                                                                                               |
|----------------------------------------------------------|---------------------------------------------------------------------------------------------------------------------------------------------------------------------------------------|---------------------------------------------------------------------------------------------------------------------------------------------------------------------------------------------------------------------------------------------------------------------------------------------------------------------------------------------------------------------------------------------------------------|
| Follow-up on maternal depression referral status         | Percentage of infant-mother dyads who received a referral at the 1-, 2-, 4-, or 6-mo WCV for whom follow-up was attempted within 4 wk                                                 | Numerator: No. infants seen at their 9-mo WCV with documentation of attempted follow-up with the mother within 4 wk of referral; denominator: all infants seen for their 9-mo WCV with documentation of a referral at the 1-, 2-, 4-, or 6-mo WCV                                                                                                                                                             |
| SDoH screening                                           | Percentage of children who completed a practice-standardized SDoH screening at the 9-, 18-, and 30-mo WCV                                                                             | Numerator: No. children seen at their 9-, 18-, and 30-mo WCV with documentation in the health record of a completed practice-standardized SDoH screening at the time of the visit; denominator: all children seen for their 9-, 18-, and 30-mo WCV whose health records are reviewed                                                                                                                          |
| Family strengths and/or protective factors               | Percentage of children with documentation of family strengths and/or protective factors in the health record completed at the 9-, 18-, and 30-mo WCV                                  | Numerator: No. children seen at their 9-, 18-, and 30-mo WCV with documentation in the health record specifying family strengths and/or protective factors; denominator: all children seen for their 9-, 18-, and 30-mo WCV whose health records are reviewed                                                                                                                                                 |
| Discussion of SDoH screening results                     | Percentage of children for whom it is documented that the family participated in a discussion of the SDoH screening results at the 9-, 18-, and 30-mo WCV                             | Numerator: No. children seen at their 9-, 18-, and 30-mo WCV with documentation in the health record of a discussion of SDoH screening results; denominator: all children seen for their 9-, 18-, and 30-mo WCV with documentation in the health record of a completed practice-standardized SDoH screening                                                                                                   |
| Referral or linkage for positive SDoH screening results  | Percentage of children with a positive SDoH screen result for whom a referral or linkage was made at the 9-, 18-, and 30-mo WCV                                                       | Numerator: No. children seen at the 9-, 18-, and 30-mo WCV with documentation of a referral or linkage; denominator: all children seen for their 9-, 18-, and 30-mo WCV with a positive practice-standardized SDoH screening result                                                                                                                                                                           |
| Social-emotional screening                               | Percentage of children who completed at least 1 social-emotional screening using a validated tool during the previous 9 mo by the 9-, 18-, and 30-mo WCV                              | Numerator: No. children seen at their 9-, 18-, and 30-mo WCV with documentation in the health record of at least 1 validated social-emotional screening completed during the previous 9 mo; denominator: all children seen for their 9-, 18-, and 30-mo visit whose health records are reviewed                                                                                                               |
| Discussion of social-emotional screening results         | Percentage of children for whom it is documented that the family participated in a discussion of the social-emotional screening during the visit at which the screening was completed | Numerator: No. children seen at their 9-, 18-, and 30-mo WCV with documentation in the health record of a discussion of the social-emotional screening results during the visit at which the screening was completed; denominator: all children seen for their 9-, 18-, and 30-month WCV with documentation in the health record of a completed validated social-emotional screening during the previous 9 mo |
| Referral for positive social-emotional screening results | Percentage of children with a positive social-emotional screen result for whom a referral was made at the time of the screening                                                       | Numerator: No. children seen at their 9-, 18-, and 30-mo WCV with documentation of a referral during the visit at which the screening was completed; denominator: all children seen for their 9-, 18-, and 30-mo WCV with a positive social-emotional screening result during the previous 9 mo                                                                                                               |
